# Supplementary material
Source: PubMed Central journal article supplement (PMC9875862)
Supplement: NIHMS1857898-supplement-1.pdf [file NIHMS1857898-supplement-1.pdf]

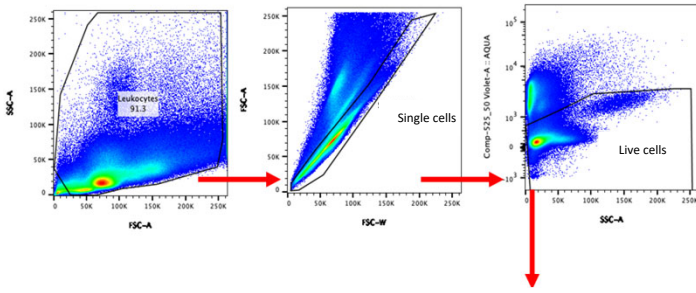

### Gating Strategy: T Cells

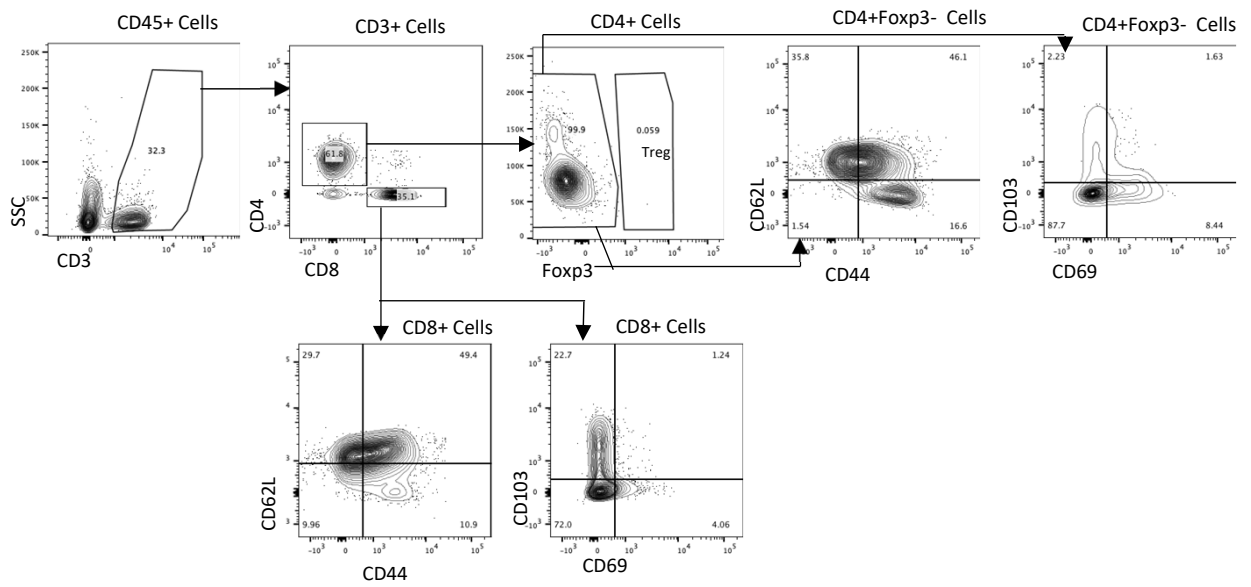

### Gating Strategy: Myeloid cells

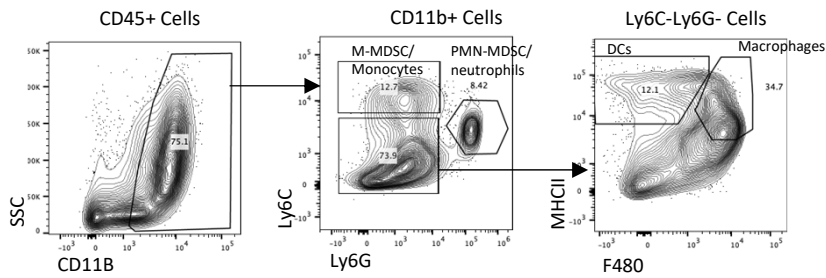

## Supplementary Table 1

| <b>Flow Cytometry Antibodies (mouse)</b> | <b>Fluorochrome</b> | <b>Company</b> | <b>Catalog number</b> | <b>Clone</b> | <b>Dilution</b> |
|------------------------------------------|---------------------|----------------|-----------------------|--------------|-----------------|
| DAPI                                     |                     | Invitrogen     | D21490                |              | 0.1ug/mL        |
| CD11b                                    | APC-cy7             | Biologend      | 101226                | M1/70        | 1:100           |
| Ly6C                                     | FITC                | Biologend      | 128006                | HK1.4        | 1:200           |
| Ly6G                                     | PE                  | Biologend      | 127607                | 1A8          | 1:100           |
| CD71                                     | APC                 | Ebioscience    | 17-0711-82            | R17217       | 0.125ug/test    |
| CD45                                     | Alexa fluor 700     | Biologend      | 103128                | 30-F11       | 1:200           |
| TIM3                                     | FITC                | invitrogen     | 11-5870-82            | RMT3-23      | 0.5ug/test      |
| LAG3                                     | Percp-Cy5.5         | Biologend      | 125212                | C9B7W        | 1:50            |
| Ki67                                     | FITC                | Biologend      | 652410                | 16A8         | 1:100           |
| CD62L                                    | APC-Cy7             | Biologend      | 104428                | MEL-14       | 1:100           |
| CD69                                     | BV650               | Biologend      | 104541                | H1.2F3       | 1:50            |
| CD11a                                    | BV605               | BD             | 740340                | 2D7          | 1:100           |
| CD3                                      | BV711               | Biologend      | 100241                | 17A2         | 1:100           |
| CD44                                     | BV785               | Biologend      | 103059                | IM7          | 1:50            |
| CD103                                    | PE 594              | Biologend      | 121430                | 2E7          | 1:50            |
| Granzyme B                               | PE                  | Biologend      | 372208                | QA16A02      | 1:20            |
| PD1                                      | PE Cy7              | eBioscience    | 25-9985-82            | J43          | 1:100           |
| CD4                                      | BUV395              | BD             | 563790                | GK1.5        | 1:100           |
| CD8                                      | BUV805              | BD             | 612898                | 53-6.7       | 1:100           |
| Nkp46                                    | PE Cy7              | Biologend      | 137618                | 29A1.4       | 1:100           |
| Ki-67                                    | APC                 | Biologend      | 652406                | 16A8         | 1:100           |
| Foxp3                                    | APC                 | Invitrogen     | 17-5773-82            | FJK-16s      | 1:50            |
| Foxp3                                    | BV421               | Biologend      | 126419                | MF-14        | 1:50            |
| <b>Flow Cytometry Antibodies (human)</b> | <b>Fluorochrome</b> | <b>Company</b> | <b>Catalog number</b> |              |                 |
| Zombie Aqua™ Fixable Viability           |                     | Biologend      | 423101                |              | 1:500           |
| CD14                                     | APC/Cyanine7        | Biologend      | 367108                | 63D3         | 1:50            |
| CD66b                                    | FITC                | BD bioscience  | 555724                | G10F5        | 1:20            |

| <b>IF Antibody</b>                      | <b>Company</b>        | <b>Catalog number</b> | <b>Concentration</b> |
|-----------------------------------------|-----------------------|-----------------------|----------------------|
| Ly-6G (1A8)                             | StemCell Technologies | 60031                 | 1:200                |
| CD3 (M-20)                              | Santa Cruz            | SC-1127               | 1:200                |
| Alexa 488 anti-Goat (secondary for CD3) | Invitrogen            | A11055                | 1:200                |
| Alexa 594 anti-RAT (secondary for Ly6G) | Invitrogen            | A21209                | 1:200                |

| <b>Immune Cell Population</b> | <b>Flow Gating Strategy</b>                                                       |
|-------------------------------|-----------------------------------------------------------------------------------|
| PMN (mouse)                   | CD11b+Ly6C <sup>low</sup> Ly6G+CD14-                                              |
| PMN (human)                   | CD11b+CD14 <sup>-</sup> CD15 <sup>+</sup> /CD66b <sup>+</sup> ; low-density cells |
| PMN-MDSC                      | CD11b+Ly6C <sup>low</sup> Ly6G+CD14+                                              |
| M-MDSC                        | CD11b+Ly6C <sup>hi</sup> Ly6G <sup>-</sup>                                        |
| T cells (Naive)               | CD3+CD62L+CD44-                                                                   |
| T cells (Effector)            | CD3+CD62L-CD44+                                                                   |
| T cells (Memory)              | CD3+CD62L+CD44+                                                                   |
| Tregs                         | CD3+CD4+Foxp3+                                                                    |
| Macrophage                    | CD11b+Ly6C <sup>low</sup> Ly6G-F480+                                              |

## Supplementary Table 2

| Reagents                                 | Source          | Identifier | Mechanism of action                       |
|------------------------------------------|-----------------|------------|-------------------------------------------|
| Imidazole Ketone Erastin                 | Cayman          | 27088      | Ferroptosis inducer                       |
| Ketorolac (tromethamine salt)            | Cayman          | 70690      | non-selective COX inhibitor               |
| Liproxstatin-1                           | Cayman          | 17730      | Ferroptosis inhibitor                     |
| ONO-AE3-208                              | Cayman          | 14522      | Antagonist of the EP4 receptor            |
| PF-04418948                              | Cayman          | 15016      | Antagonist of the EP2 receptor            |
| Rofecoxib                                | Cayman          | 10010260   | COX-2 selective inhibitor                 |
| RSL3                                     | Selleck Chem    | S8155      | Ferroptosis inducer                       |
| InVivoMAb anti-mouse PD-1, clone RMP1-14 | Bio X Cell      | BE0146     | PD1 antibody                              |
| Staurosporine                            | SelleckChemical | S1421      | Apoptosis Inducer                         |
| 4-Aminobenzoic Acid Hydrazide (4-ABAH)   | Cayman          | 14845      | Myeloperoxidase inhibitor                 |
| Z-VAD-FMK                                | Cayman          | 14463      | Pan-caspase inhibitor/apoptosis inhibitor |

## Supplementary Table 3

| Mouse Primer Sequence | Sequence                 |
|-----------------------|--------------------------|
| mVDAC2                | TCGGCAAAGCTGCCAGAGACAT   |
| mVDAC2                | GTCTCCAAGGTCCCCTAACTT    |
| mNOX1                 | CTCCAGCCTATCTCATCCTGAG   |
| mNOX1                 | AGTGGCAATCACTCCAGTAAGGC  |
| mPHKG2                | ACCCAGGCTATGGCAAGGAAGT   |
| mPHKG2                | TGCGTAGCATCAGGATTTGGCG   |
| mSAT1                 | GAGGATGGCTTTGGAGAACC     |
| mSAT1                 | GATACAGCAACTTGCCAATCCATG |
| mCHAC1                | TGACCCTCCTGAAGACCGTGA    |
| mCHAC1                | AGTGTCCATAGCCACCAAGCACG  |
| mACSL4                | CCTTTGGCTCATGTGCTGGAAC   |
| mACSL4                | GCCATAAGTGTGGGTTTCAAGTAC |
| mCARS                 | TCATGGTGGAGGGTTTGACCTC   |
| mCARS                 | GGACATCTGCAGCCTGCTATC    |
| mHO-1                 | CACTCTGGAGATGACACCTGAG   |
| mHO-1                 | GTGTTCTCTGTCAGCATCACC    |
| Human Primer Sets     | Sequence                 |
| HTBP_Fw               | TTCGGAGAGTTCTGGGATTGTA   |
| HTBP_Rw               | TGGACTGTTCTTCACTCTTGGC   |
| HGAPDH_Fw             | CTTCAACAGCGACACCCACT     |
| HGAPDH_Rw             | GTGGTCCAGGGTCTTACTC      |
| hTRFC_FW              | ACTTGCCAGATGTTCTCAG      |
| hTRFC_RV              | GTATCCCTCTAGCCATTCAGTG   |
| hPTGS2_FW             | ACAGGCTTCCATTGACCAG      |
| hPTGS2_RV             | TCACCATAGAGTGCTTCCAAC    |
| hHMOX1_FW             | TCAGGCAGAGGGTGATAGAAG    |
| hHMOX1_RV             | TGGATGTTGAGCAGGAACGCAGT  |
| hHILPDA_FW            | TTAGAGTGATGGAGTCCCTAGAG  |
| hHILPDA_RV            | AGGTCTTATCACATGCTTCTGG   |
| hSLC3A2_FW            | GGCAAAATATCACCAAGGGC     |
| hSLC3A2_RV            | CCAGTAGAACCAGAATCAGACAG  |
| hCHAC1_FW             | TTGAAGATCATGAGGGCTGC     |
| hCHAC1_RV             | GCAAGTATTCAAGTTGTGGC     |
| hNFE2L2_FW            | ACATCCAGTCAGAAACCAAGTG   |
| hNFE2L2_RV            | AACGTAGCCGAAGAAACCTC     |
| hHSPB1_FW             | ATGTCAACCACTTCGCC        |
| hHSPB1_RV             | GTGAAGCACCGGGAGATG       |

| Human Primer Sets      | ThermoFisher Scientific catalog number |
|------------------------|----------------------------------------|
| B-actin: Hs99999903_m1 | Catalog number: 4331182                |
| COX1:Hs00377726_m1     | Catalog number: 4331182                |
| COX2:Hs00153133_m1     | Catalog number: 4331182                |
| mPGES1:Hs00610420_m1   | Catalog number: 4331182                |
| cPGES:Hs01566252_m1    | Catalog number: 4351372                |
| mPGES2:Hs00228159_m1   | Catalog number: 4331182                |
| TFRC:Hs00951083_m1     | Catalog number: 4331182                |
| HMOX1:Hs01110250_m1    | Catalog number: 4331182                |
| HILPDA:Hs04991881_m1   | Catalog number: 4351372                |
| CHAC1:Hs03043929_m1    | Catalog number: 4351372                |

## Supplementary Table 4

|                  |  |                                                                                                                                          |  |  |  |
|------------------|--|------------------------------------------------------------------------------------------------------------------------------------------|--|--|--|
| PMN              |  | polymorphonuclear leukocytes or granulocytes or neutrophils – neutrophils in tumor free mice and CD14- neutrophils in tumor bearing mice |  |  |  |
| MON              |  | monocytes                                                                                                                                |  |  |  |
| MDSC             |  | myeloid derived suppressor cells                                                                                                         |  |  |  |
| PMN-MDSC         |  | granulocytic myeloid derived suppressor cells – CD14+ PMN in tumor bearing mice and tumor microenvironment                               |  |  |  |
| M-MDSC           |  | monocytic myeloid derived suppressor cells                                                                                               |  |  |  |
| BM               |  | bone marrow                                                                                                                              |  |  |  |
| TME              |  | tumor microenvironment                                                                                                                   |  |  |  |
| ICB              |  | immune checkpoint blockade                                                                                                               |  |  |  |
| GPX4             |  | glutathione peroxidase 4                                                                                                                 |  |  |  |
| GSH              |  | glutathione                                                                                                                              |  |  |  |
| PUFA             |  | polyunsaturated fatty acids                                                                                                              |  |  |  |
| PL-PUFA          |  | phospholipid PUFA                                                                                                                        |  |  |  |
| ACSL4            |  | acyl-coenzyme A chain family member 4                                                                                                    |  |  |  |
| ALOX             |  | arachidonate lipoxygenase                                                                                                                |  |  |  |
| NSCLC            |  | non-small cell lung cancer                                                                                                               |  |  |  |
| HNC              |  | head and neck cancer                                                                                                                     |  |  |  |
| PEox             |  | oxidized phosphatidylethanolamine                                                                                                        |  |  |  |
| AA               |  | arachidonic acid                                                                                                                         |  |  |  |
| IKE              |  | imidazole ketone erastin                                                                                                                 |  |  |  |
| PGE <sub>2</sub> |  | prostaglandin E2                                                                                                                         |  |  |  |
| COX              |  | cyclooxygenase                                                                                                                           |  |  |  |
| FATP2            |  | fatty acid transport protein 2                                                                                                           |  |  |  |
| TCGA             |  | The Cancer Genome Atlas                                                                                                                  |  |  |  |
| PAAD             |  | pancreatic adenocarcinoma                                                                                                                |  |  |  |
| LUAD             |  | Lung adenocarcinoma                                                                                                                      |  |  |  |
